# Supplementary material for: Myocardial Infarction Primes Autoreactive T Cells through Activation of Dendritic Cells
Source: PubMed Central journal article supplement — Cell Rep. 2017 Mar 21;18(12):3005–17. doi: 10.1016/j.celrep.2017.02.079 (PMC5379012; doi:10.1016/j.celrep.2017.02.079), 2017-03-21
Supplement: mmc1.pdf [file mmc1.pdf]

**Cell Reports, Volume 18**

**Supplemental Information**

**Myocardial Infarction Primes Autoreactive T Cells  
through Activation of Dendritic Cells**

**Katrien Van der Borgh, Charlotte L. Scott, Veronika Nindl, Ann Bouché, Liesbet Martens, Dorine Sichien, Justine Van Moorleghem, Manon Vanheerswynghels, Sofie De Prijck, Yvan Saeys, Burkhard Ludewig, Thierry Gillebert, Martin Guilliams, Peter Carmeliet, and Bart N. Lambrecht**

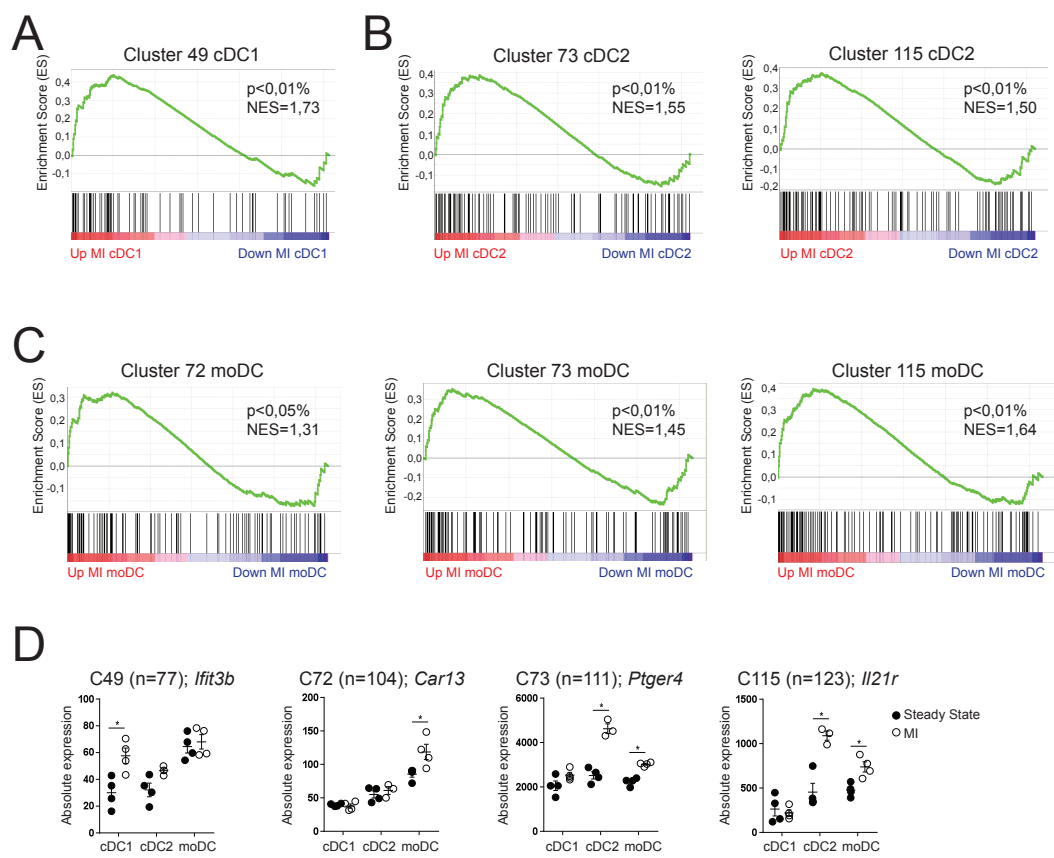

**Figure S1. Related to Figure 5.**

Gene Set Enrichment Analysis (GSEA) shows the similarity that is found in the upregulation of genes in specific DC subsets from steady state heart to DC subsets from infarcted heart at day 7 post MI with gene clusters that are upregulated in TLR-induced and homeostatic maturation (Ardouin et al, 2016). The resulting enrichment plots are shown in (A-C), as well as the corresponding values of normalized enrichment scores (NES) and false discovery rates (p). (A) Cluster 49 represents genes that are upregulated specifically in TLR-induced maturation. Highly significant enrichment of C49 genes is observed in cDC1s from MI d7 heart. (B) Cluster 73 and 115 represent genes upregulated both in TLR-induced and homeostatic maturation and were found to be significantly enriched in cDC2s from MI d7 heart compared to cDC2s from steady state heart. (C) Clusters 72, 73 and C115 are significantly enriched in heart moDCs at day 7 post MI compared to heart moDCs in steady state. C72 is also enriched in TLR-induced and homeostatic maturation. (D) Absolute expression of representative genes from C49, C72, C73 and C115 which are enriched in specific DC subsets at day 7 post MI compared to steady state (Mean $\pm$ SEM;  $p < 0.05$ ).

Table S1a. Related to Figure 5

## Differentially expressed genes: St St vs MI cDC1s

| Up-regulated  |           | Down-regulated |               |
|---------------|-----------|----------------|---------------|
| Flot1         | Cacna1s   | Cxx1a          | Clec5a        |
| Emb           | Tcta      | Tlr2           | Cyt11         |
| Wfdc17        | Ednra     | Fam65b         | Aspn          |
| Lpar1         | Tmem159   | Gadd45g        | Icosl         |
| Plac8         | Ano1      | Pde2a          | Rasl11b       |
| Ifitm1        | Rapgef3   | Rbp7           | Rasl12        |
| Tdgf1         | Parva     | Hsp90aa1       | Gata2         |
| Ifitm2        | Hbegf     | Cfh            | S100a10       |
| Casp6         | Bcl6b     | Slc25a29       | Pstpip2       |
| Pla2g7        | Bbc3      | Adcy6          | Stmn2         |
| Dok3          | Lyz2      | Pkia           | Adgrg1        |
| Ank1          | Mob3c     | Gucy1b3        | Arpin         |
| 0610040J01Rik | Cyp8b1    | Slc28a2        | Pdel1b        |
| Prss57        | Stambpl1  | Ebi3           | Cav2          |
| Tmem173       | Slc16a2   | Ctsw           | Zfp862-ps     |
| Dpy19l3       | Zfp867    | Crim1          | Cyp2s1        |
| Fcrlb         | Dusp2     | Lum            | Itga7         |
| Arhgef10      | Hvcn1     | Yap1           | St6galnac3    |
| Ptgdr2        | Vcam1     | Serpina3f      | Tspan7        |
| Jak3          | Dnaja1    | Otof           | S1pr3         |
| P2ry1         | Kdr       | Ifnlr1         | Arhgap29      |
| Lefty1        | Cd101     | Mpzl2          | Abca9         |
| Dip2c         | Nrarp     | Hs3st1         | Afap111       |
| Zdhhc23       | Dedd2     | Pdlim3         | Sertad1       |
| Itga6         | Sncg      | Fndc4          | Trim2         |
| Chac1         | Trem14    | Zbtb32         | 4930502E18Rik |
| Smad7         | Dll4      | Trib2          | Cd163         |
| F830002L21Rik | Ldb2      | Atf4           | Ctnnd1        |
| Plet1         | Trf       | Pik3r3         | Tnfrsf9       |
| Camkk1        | Bend6     | Lox            | Abcc9         |
| Xxylt1        | Ncr1      | Gimap1         | Irf1          |
| Slc8a1        | Nfkbie    | Hspa11         | Ptprm         |
| Gpr4          | Egr1      | Ncf2           | Phldb2        |
| Htr7          | Cygb      | Gper1          | Il1a          |
| Plscr1        | Epcam     | Egfl7          | Pxdn          |
| Btbd11        | Efnb2     | Pygm           | Mmp15         |
| Ier3          | Gm11837   | Slc2a4         | Tns1          |
| Ctnnd2        | Serping1  | Ppap2b         | Gbp2          |
| Lgmn          | S100a16   | Etv1           | Slc5a3        |
| Gpr171        | Hmox1     | Spata13        | St5           |
| Palm          | Susd5     | Slc26a10       | Aldh1a2       |
| Ptpn1         | Ldhb      | Hspa1a         | St6gal1       |
| Ggt5          | Ccl9      | Zfp296         | Tnfsf9        |
| Nxpe3         | Fam101b   | Fzd4           | Cdc42ep1      |
| Scamp1        | Gphn      | Mcam           | Hspa1b        |
| Cc17          | Ndufa4l2  | Map3k7cl       | Sorbs1        |
| Mmp14         | Ctgf      | Tnni3          | Flrt3         |
| Gpsm2         | Gcnt2     | Il1rl1         | Tnfsf8        |
| Syt11         | Serpinb6b | Hey1           | Myl9          |
| Pik3cd        | Wnt11     | Gprc5a         | Tns2          |
| Bcl11a        | Jun       | Sult1a1        | Entpd1        |
| BC021614      | Tacc2     | Mb             | Txnip         |
| Ubr4          | Fas       | Ccnd2          | Clec4a2       |
|               | Myl3      | Cd81           | Cd300lg       |

Table S1b. Related to Figure 5

## Differentially expressed genes: St St vs MI cDC1s

| Down-regulated |         |               |          |
|----------------|---------|---------------|----------|
| Spn            | Aqp7    | Aoc3          | Ccdc3    |
| Zc3h12a        | Clec4b1 | Axl           | Pdlim1   |
| Adgre1         | Mgp     | Sema3g        | Olfir558 |
| Dcstamp        | Sox17   | Lims2         | Nkg7     |
| Wwtr1          | Steap4  | Dnajb4        | Gas6     |
| Sspn           | Kcnab1  | Ltb4r1        | Tpm2     |
| Atp8b1         | Jam3    | Timp2         | Ptprb    |
| Frm4b          | Msrb3   | Cav1          | Serpib10 |
| Igfbp5         | Arhgef3 | Esam          | Dok2     |
| Serpib8        | Gimap4  | Aqp1          | Cldn5    |
| Fhl1           | Il12rb2 | Cyr61         | Il2rb    |
| Gem            | Ddit4   | Ltbp4         | Tinagl1  |
| Ly6a           | Fndc7   | Trim47        | Sparc    |
| Eng            | Mmrn2   | Mfge8         | Ptfr     |
| Mcomp1         | Gypc    | Nfkbiz        | Rgs4     |
| Egflam         | Mgl1    | 9430020K01Rik | Gja5     |
| Nfkbia         | Alpl    | Rhoj          | Ets1     |
| Rin2           | Phlda1  | Tmem47        | Tagln    |
| Clu            | Emp2    | Mmp19         |          |
| Hsph1          | Xlr     | Nrip2         |          |
| Cers4          | Crip2   | S1pr1         |          |
| Plau           | Lmna    | Cd1d1         |          |
| Cd34           | Nfkbid  | Tnf           |          |
| Dnase113       | Plxdc2  | Dnajb1        |          |
| Pltp           | Sulf1   | Mamdc2        |          |
| Dysf           | Sema6d  | Tnfsf13b      |          |
| L1cam          | Ptpro   | Ablim1        |          |
| Cd8a           | Adgrf5  | Pcp411        |          |
| Gadd45b        | Bag3    | Naalad2       |          |
| Tcf15          | Tnfaip2 | Lamb2         |          |
| Tbx2           | Apold1  | Cd209a        |          |
| Col3a1         | Rasl11a | Clec14a       |          |
| Ccl17          | Tmem204 | Aplnr         |          |
| Tesc           | Nppa    | Igfbp4        |          |
| Eln            | Sod3    | Epas1         |          |
| Emp1           | Pdgfrb  | Jam2          |          |
| Fam198b        | Kitl    | Ly6c1         |          |
| Sdcbp2         | Col4a1  | Lpl           |          |
| Ephx1          | Ace     | Gzma          |          |
| Cald1          | Sox18   | Nedd4         |          |
| Gfra2          | Timd4   | Id3           |          |
| Smpd3b         | Gstm1   | Prf1          |          |
| Grap           | Fstl1   | She           |          |
| Arhgef15       | Gm13889 | Htra1         |          |
| Tppp3          | Tie1    | Pecam1        |          |
| Gpihbp1        | F11r    | Ephb4         |          |
| Rhof           | Cdh13   | Cd93          |          |
| Col8a1         | Fermt2  | Mustn1        |          |
| Cnn1           | Hes1    | Gucy1a3       |          |
| Hspa12b        | Bcam    | Ly6e          |          |
| Lamc1          | Gimap6  | Adam23        |          |
| Slc11a1        | Zfand2a | Pcdh7         |          |
| Sh3pxd2a       | Cd207   | Serpinh1      |          |
| Sell           | Sdc1    | Nppc          |          |

Table S2a. Related to Figure 5

## Differentially expressed genes: St St vs MI cDC2s

| Up-regulated  |               |               |               |               |
|---------------|---------------|---------------|---------------|---------------|
| Fxyd7         | 1110032F04Rik | Spsb1         | Klrc1         | Nedd4l        |
| Ifitm1        | Fads2         | Siglece       | Zmynd15       | Mif4gd        |
| Slc16a14      | St8sia1       | Dab2          | Mfsd6         | Bmf           |
| Enpp1         | Gent1         | 2510009E07Rik | Amacr         | Gpr137b       |
| Ffar2         | Lsr           | Myo1b         | Wwc2          | Sestd1        |
| Cdh1          | Soat2         | Lpar3         | Cux1          | Clec5a        |
| Rptoros       | Kit           | Il21r         | Ubr4          | Cdc14a        |
| Card11        | Ly75          | Hrh2          | Sh3pxd2b      | Bmp2k         |
| Zbtb18        | Gpr162        | Adam23        | Gpr4          | Cog7          |
| Lgi4          | Actn1         | Prss30        | Dennd3        | Gnptab        |
| 2900026A02Rik | Gpre5c        | Ffar4         | Pdk1          | Atp6v0a1      |
| Cep170b       | Ifit1         | Igfbp6        | Osbpl7        | Lmtk2         |
| Ppm1j         | Gm7609        | Flt3          | Cd33          | Ltb           |
| Dscam         | Cd300lf       | Jak3          | Fmn13         | Gstt3         |
| Ctnnd2        | A530032D15Rik | 0610040J01Rik | Bst1          | Cpd           |
| Tmem231       | Tnfrsf4       | Rnf157        | Gpr171        | Soga1         |
| Ocln          | Ccr6          | Tmem158       | Grasp         | Rogdi         |
| Cyp7b1        | Htra3         | Plxnc1        | Ifit2         | Tgfb1         |
| Entpd3        | Galnt12       | Gdf15         | Cdyl2         | Hdac6         |
| Timp1         | Numa1         | Sulf2         | Dhfr          | Ptprs         |
| Galnt6        | Msantd1       | Btla          | Cpne2         | Asx11         |
| Lox           | Fads3         | Hpgds         | Acvr2a        | Abhd15        |
| Il1r2         | Ccnj1         | Mov10         | Slc12a7       | Gpr183        |
| Angptl2       | Upp1          | Casp6         | 6330416G13Rik | Ciita         |
| Mreg          | Hip1r         | Spint2        | Mink1         | Arhgap22      |
| Plekha5       | Tbc1d16       | Pxdc1         | Arid2         | Ssh1          |
| Dbn1          | Nav2          | Dock4         | Agap1         | Anpep         |
| Spon1         | Shisa9        | Atp8b1        | Ttyh2         | SIfn5         |
| Htr7          | Cttnbp2nl     | Selp          | Cxc116        | Fam3c         |
| Cd72          | Timd4         | 2010315B03Rik | St8sia6       | Knop1         |
| Mmp14         | Basp1         | Itga6         | Bach2         | 1700021K19Rik |
| Il2ra         | Slc22a23      | Klrb1c        | Ccdc88b       | Rrad          |
| Gpnmb         | Il7r          | Hivep2        | Slc14a1       | Syt11         |
| Trp53i11      | Ssx2ip        | Spns3         | Nbeal2        | Csf2rb2       |
| Tnfrsf4       | Klrb1b        | Pik3cb        | Fam134b       | Tmem173       |
| Dmkn          | Zfp366        | Kif1a         | Ipcef1        | Smad7         |
| Tmem150c      | Cd38          | Slc7a11       | Hexb          | Tns3          |
| Epcam         | Aatk          | Stk38l        | Clec4n        | Creb5         |
| A4galt        | Stil          | Ppp1r3b       | Med13l        | Arap3         |
| Spp1          | Scin          | Ddr1          | Ptgs2         |               |
| Pram1         | Pdlim7        | Fbrs1l        | Map4k3        |               |
| Arhgef40      | Tbc1d4        | Nxpe5         | Gab2          |               |
| Gpr82         | Fnip2         | Stat4         | Capn15        |               |
| Syngri1       | Rtn4rl1       | Pvr14         | Trp53bp1      |               |
| Scel          | Apbb2         | Iptr3         | Ifit3         |               |
| F11r          | Uvssa         | Zdhhc23       | Ptger4        |               |
| Ggt5          | Flot1         | Calcr1        | Myh9          |               |
| Prune2        | Cst7          | Klrd1         | 8430419L09Rik |               |
| Il18rap       | Klrb1f        | Lin9          | Uck2          |               |
| Rgs12         | H2-Oa         | Smarca2       | B3gnt8        |               |
| Adam11        | Myo1e         | Gga2          | Foxj2         |               |
| Abcb4         | Ttl5          | Atp8a1        | Jak2          |               |
| Dkk1l         | Cul7          | Klra3         | Dock5         |               |
| Arhgap24      | Tjp3          | Zeb1          | Fcgr1         |               |
| Plscr1        | Cxxc5         | Galm          | Vsig10        |               |

Table S2b. Related to Figure 5

## Differentially expressed genes: St St vs MI cDC2s

| Down-regulated |           |               |         |           |               |               |
|----------------|-----------|---------------|---------|-----------|---------------|---------------|
| Ahcyl2         | Vps9d1    | Tbxas1        | Serpib8 | Xlr       | Sparc         | Cers4         |
| Igfbp4         | Crim1     | Ptgir         | Rhob    | Adams1    | Negr1         | Cp            |
| Ii18           | Ldlr      | Hr            | Smpd13b | Fcrl1     | Epha10        | Ptrf          |
| Bcl2a1a        | Synpo     | Nsl1          | Mrps6   | Tmem71    | BC035044      | Ryk           |
| Slc22a5        | Mad211bp  | Lonrf1        | Gcc1    | Tlr11     | Gfra2         | Igfbp7        |
| Aif1           | Id1       | Rffl          | Rnd1    | Slc4a5    | Sectm1a       | Tppp          |
| Eif5           | F10       | Cxx1c         | Pla2g16 | Acta2     | Kank3         | Tinag1        |
| Cxcl1          | Mir22hg   | Ifitm6        | Slc13a3 | Ldlrad1   | Cracr2b       | Nxpe4         |
| Oxct1          | Adam8     | Tsc22d3       | Sgms2   | Cdc42ep1  | Cd209d        | Abcg3         |
| Acot9          | Cks2      | Bbc3          | Tnfaip6 | Col14a1   | Slc9a4        | Adamdec1      |
| Ttc39b         | Rras      | Rab20         | Cxcl10  | Dnaja1    | Sdc1          | Tppp3         |
| Tmem159        | Plxdc1    | St3gal3       | Itga9   | Akr1c13   | 4930455G09Rik | Lpl           |
| Cd84           | Tns1      | Phlda3        | Nrg2    | Olfir1033 | Thsd4         | Efnb2         |
| Rxra           | Pwv2b     | Tsc22d1       | Rgcc    | Crip2     | Colec12       | E230016K23Rik |
| Tmem62         | Rab7b     | Rbpms         | Msrb3   | Sec16b    | Tmem229a      | Rem1          |
| Plau           | Mpeg1     | Gbp3          | Sqrd    | Cd300lb   | Ras11b        | Bag3          |
| St3gal1        | Hic2      | Plaur         | Bcam    | Plxna4    | Fabp7         | Pf4           |
| Dgat2          | Hspe1     | Tarsl2        | Icam1   | Tmcc1     | Etv1          | Ehd2          |
| Prr51          | Pira6     | Adgre1        | Hspa1a  | Ncr1      | Nkg7          | Omp           |
| Rhot2          | Tnfsf14   | Nr1h3         | Ccl9    | Pilra     | Ii27ra        | Spic          |
| Mtmr10         | Pde2a     | Gpr84         | Nos3    | Mgst1     | Cd79a         | Hes1          |
| Dram1          | Serpib6a  | Dnajb4        | Lmna    | Trf       | Ets1          | Prfl          |
| Clec4e         | Zfand2a   | Nod1          | Phlda1  | Mxra7     | Kitl          | Ak8           |
| Cd300ld        | Fcgr3     | Nedd4         | Adrb1   | Espn      | Cebpe         | Lyz2          |
| Ltb4r1         | Arhgef10l | Clec4g        | Hnmt    | Rgs4      | Plcb1         | A530064D06Rik |
| Zswim6         | Adss1l    | Batf          | Ldlrad3 | Dpy19l3   | Celf4         | Hepacam2      |
| Socs6          | Glrx      | Fn1           | Gimap4  | Gypc      | My13          | Kazald1       |
| Igfb3          | Pla2g7    | Id3           | Prdm16  | Stox2     | Tspan7        | Dmpk          |
| Txnip          | Stard4    | Sgms1         | Col4a1  | Cd300e    | Tmem26        | Nfe2          |
| Sertad1        | Hsp90aa1  | Maf           | Adgre5  | Tm4sf1    | Dok2          | Spink2        |
| Daglb          | Areg      | Ifrd1         | Fgd4    | Tnfaip8l1 | Hey1          | Serpib10      |
| Slc16a1        | Slc5a3    | St3gal6       | Sh3bp5  | Sphk1     | Sv2b          | Slc12a2       |
| Tnfaip2        | Dusp10    | Tmeff1        | Grap    | Gas7      | Aplnr         | F3            |
| Ppt2           | Capn5     | Mturn         | Trem3   | Vcam1     | Rorc          | Ptger2        |
| Unc119         | Rnasel    | Thbd          | Crem    | Abcd2     | Hcar2         | Hopx          |
| Tubb6          | Cd300lg   | Lmo1          | Dleu2   | Cd163     | Atp1a3        | Gjb2          |
| Tspan33        | C5ar1     | Tmem154       | Dusp6   | Pilrb1    | Slc11a1       | Slc15a2       |
| Cd44           | Apoe      | Selenbp1      | Ccl2    | Ryr1      | Gpre5a        | Ccdc149       |
| Mt1            | Dedd2     | Ccr9          | Cma1    | Cxcl9     | Ii1a          | Trem4         |
| Adrb2          | Bank1     | Olfml3        | Nupr1   | Ceacam1   | Klrb1a        | Rnase2a       |
| Crat           | St3gal5   | Tnfsf13b      | Grk5    | Gfi1b     | Fabp4         | Cd81          |
| Mapk6          | Cyp4f18   | March8        | Zfyve9  | Acy1      | Sh2d2a        | Lrrc3         |
| Ccdc117        | Pparg     | Icam2         | Hbegf   | Oas1l     | Ly6e          | Ly6c2         |
| Slfn2          | Ifi2712a  | Kcne3         | Mefv    | Has1      | Pde12         | Cdc42ep2      |
| Rbm48          | Crip1     | Sept11        | Gbp8    | Gm21188   | Ii1rn         | Klra2         |
| Gpsm2          | Tpst2     | Fam20a        | Hsph1   | Pkdcc     | Hspa1b        | Pglyrp1       |
| Ctsf           | Gbp9      | Klhl13        | Ikzf3   | Fpr2      | Fzd4          | Ccdc170       |
| Notch1         | Atf4      | Sult1a1       | Clec9a  | Gpihbp1   | Ica11         | Ear2          |
| Cib1           | Capg      | Trim41        | Fcrls   | Fgd6      | Cish          | Cd209b        |
| Klf2           | Mmp19     | Clec4f        | Cd36    | Pilrb2    | Ccl6          | Ephx1         |
| Cpq            | S1pr4     | Gas6          | Lyz1    | Chrna5    | Gm14085       | Arhgef37      |
| Batf3          | Plxdc2    | Rarb          | Kenq1   | Gm6297    | Ankrd13b      | Ace           |
| Rilpl2         | Cd177     | Gpr65         | Cd2     | Mras      | Ndnf          | Hmox1         |
| Gbp2           | Tlr7      | Ccr3          | Akr1c18 | Cnn3      | Wnt11         | Otof          |
| Sat1           | Folr2     | Alox15        | Hspb1   | Steap3    | Slco2b1       | Sema4b        |
| Tfdp2          | Hes2      | Itk           | Hpgd    | Cyr61     | Serpib2       | F13a1         |
| Sepp1          | Gbp4      | Cebpb         | Retnla  | Upb1      | Slc27a3       | C4b           |
| Camkk2         | Ccl7      | 1810011O10Rik | Gzma    | Cd226     | Nrarp         |               |
| Rasgrp2        | Slc28a2   | Ccl24         | Pdlim1  | Mmp13     | Timp3         |               |
| Trpm2          | Sgce      | Ii2rb         | Lgi3    | Ii6       | Mamdc2        |               |
| Steap4         | Ecm1      | Hsd11b1       | P3h2    | Igal      | Dnajb1        |               |
| Crym           | Adgre4    | Hebp2         | Jchain  | Aldh1a2   | Galnt9        |               |
| Mt2            | Tlr12     | Ptgs1         | Rnf144a | Thbs1     | Ms4a8a        |               |
| Agpat3         | Lilra5    | 9830107B12Rik | Cyp2ab1 | Lck       | Cd207         |               |

Table S3. Related to Figure 5

## Differentially expressed genes: St St vs MI moDCs

| Up-regulated  |               | Down-regulated |          |          |          |
|---------------|---------------|----------------|----------|----------|----------|
| Fxyd7         | Ndnf          | Cd226          | Slc22a18 | Mgll     | Pla2g2d  |
| Fam83f        | Adgre5        | Lpin1          | Syt3     | Gas6     | Mtmr11   |
| Zbtb18        | Ly6e          | Hs3st3a1       | Cd209d   | Dpysl3   | Agpat3   |
| Ifnlr1        | Gas1          | Trp53rka       | Ephx3    | Cav1     | Tnni3    |
| Stat4         | Smarcd3       | Fbp1           | Ptk2     | Tmem26   | Adamdec1 |
| Nt5e          | Thrsp         | Tln2           | Fxyd2    | Cables1  | Ckm      |
| Spon1         | Igf1          | Slc2a4         | Serpine1 | Tlr12    | Mxra8    |
| Tnfrsf9       | Sh3bp5        | Csf1           | Wtip     | Vcam1    | Alpl     |
| Arhgap24      | Cish          | Adcy4          | Il6      | Smpd13b  | St3gal6  |
| Il7r          | Mycl          | Ear2           | Cxx1c    | Folr2    | Slco2b1  |
| Prss46        | Cdc42ep2      | Cdkn1c         | Crip2    | Nkg7     | Igfbp4   |
| Htr7          | Fam101b       | Ablim1         | Tmem204  | Tmem47   | Tgfb3    |
| Galnt6        | Dusp7         | Mmp2           | Bcl6b    | Iigp1    | Nrip2    |
| Tmem158       | Fam43a        | Asb10          | Gm13889  | Dnajb4   | Dnaja1   |
| Cxcr3         | Lyz1          | Sema4c         | Cxcr2    | Prf1     | Cxcl12   |
| Lgi4          | Hdc           | 9430015G10Rik  | Hbegf    | Lck      | Lims2    |
| Plxnc1        | Tnnt2         | Unc5b          | Tek      | Id3      | Stard13  |
| Cdk18         | Myl9          | Itga9          | Hspg2    | Hey1     | Gpr165   |
| 2900026A02Rik | Ptp4a3        | Cuedc1         | Ras12    | Atp9a    | Grp      |
| Angptl2       | Dedd2         | Timp3          | S100a16  | Cd2      | Slc12a2  |
| Gpc1          | St3gal1       | Mrv1           | P2ry13   | Gm14085  | Cdc42ep1 |
| Rai14         | Ebi3          | Msrb3          | Tagln    | Rgl3     | Hsph1    |
| Mmp14         | Gbp9          | Smagp          | Fam65b   | Mustn1   | Slc27a6  |
| Ndrg1         | Tbx20         | Gprc5a         | Ndrg2    | Gm6297   | Etv1     |
| Plscr1        | Tmecc1        | Cxcr6          | Cyr61    | Fabp3    | Myl2     |
| Ifit2         | Maf           | Ptprg          | P3h2     | Adgrl2   | Clic5    |
| Slc7a11       | Ddah2         | Ltbp4          | Cracr2b  | Slc28a2  | Apold1   |
| Fbx12         | Unc13b        | Epas1          | Neur11a  | Clec4f   | Actc1    |
| Fam132a       | Npnt          | Spic           | Trpv4    | Nedd4    | Pf4      |
| Map4k3        | Lhfp          | Mag            | Ctsf     | Pyroxd2  |          |
| Slc27a1       | Asb2          | Crim1          | Gm4951   | Serpinh1 |          |
| Anpep         | Alox15        | Ly6a           | Cyp2ab1  | Adgrl4   |          |
| Ms4a7         | AW011738      | Rhobtb1        | Fzd4     | Cbr2     |          |
| Nxpe5         | Txnip         | Tmod1          | She      | Perp     |          |
| Dock5         | Oasl1         | Trpm2          | Fcrls    | Tpm2     |          |
| Cdh1          | Tppp3         | Serpinh8       | Sept4    | Mylk     |          |
| Aatk          | Heg1          | Icam2          | Gpihbp1  | Klra2    |          |
| Il18rap       | Tsc22d3       | Rnf144a        | Fbln2    | Afap111  |          |
| Ramp3         | Igf2bp3       | Nid2           | Capn3    | Cdh5     |          |
| Scin          | Gcc1          | Tmem45b        | Chp2     | F13a1    |          |
| Gcnt1         | Adrb2         | Ly6c2          | Id1      | BC035044 |          |
|               | Rgs5          | Ly6c1          | Bcam     | Cd207    |          |
|               | 8430408G22Rik | Mb             | Lilra5   | Crym     |          |
|               | Adgre4        | Aqp7           | Hpgd     | Adamts1  |          |
|               | Gbp4          | Hspa1a         | Slc15a2  | Myoz2    |          |
|               | Mmp9          | Sult1a1        | Agmo     | Ephx1    |          |
|               | Tppp          | Gja4           | Cd36     | Ptrf     |          |
|               | Acta2         | Xlr            | Hcar2    | Pln      |          |
|               | Cxcl13        | Igf2           | Ets1     | Alox5    |          |
|               | Itgal         | Kcnq1          | Cd81     | Cd34     |          |
|               | Fabp4         | Sdpr           | Mmp13    | Cdr2     |          |
|               | C1qtnf1       | Bag3           | Tnfsf13b | Myl7     |          |
|               | Mxra7         | Itga7          | Nppa     | Rhoj     |          |
|               | Epor          | Ehd2           | Ppp1r9a  | Cald1    |          |
|               | Serpinf1      | Cd209b         | Pdlim1   | Adgrg1   |          |
|               | Sparcl1       | Illdr2         | Adrb1    | Cmah     |          |
|               | Gzma          | Hepacam2       | Il1a     | Cp       |          |
|               | Klhl13        | Cd163          | Celf4    | Hspb1    |          |
|               | Lrrc3         | Mucl1          | Ptgs1    | Dmpk     |          |
|               | Nrarp         | Heyl           | Egfl7    | Sorbs2   |          |
|               | Bank1         | Vsig4          | Nos3     | Slc9a3r2 |          |
|               | Retnla        | 1810011O10Rik  | Gm4980   | Gja5     |          |
|               | Tspan7        | Hes1           | Myl3     | Dnajb1   |          |
|               | Sgce          | Hspa1b         | Hs3st1   | Il2rb    |          |

Table S4. Related to Figure 5

**54 differentially expressed genes: St St vs MI cDC1s, cDC2s and moDCs**

| Up-regulated |         | Down-regulated |          |        |
|--------------|---------|----------------|----------|--------|
| Htr7         | Ly6e    | Gas6           | Cdc42ep1 | Bag3   |
| Mmp14        | Dedd2   | Vcam1          | Hsph1    | Hspa1a |
| Plscr1       | Txnip   | Smpd13b        | Etv1     | Gzma   |
|              | Tppp3   | Nkg7           | Ephx1    | Nrarp  |
|              | Msrb3   | Dnajb4         | Ptrf     | Tspan7 |
|              | Gprc5a  | Prf1           | Ets1     | Cd163  |
|              | Crim1   | Id3            | Cd81     | Hes1   |
|              | Serpib8 | Hey1           | Tnfsf13b | Hspa1b |
|              | Crip2   | Slc28a2        | Pdlim1   | Dnajb1 |
|              | Hbegf   | Nedc4          | Ili1a    | Ii2rb  |
|              | Cyr61   | Igf1bp4        | Myl3     | Cd207  |
|              | Fzd4    | Dnaj1          | Sult1a1  | Bcam   |
|              | Gpihbp1 | Grap           | Xlr      |        |

Table S5. Related to Figure 5

**64 differentially expressed genes: St St vs MI cDC1s and cDC2s**

| Up-regulated  |          | Down-regulated |          |         |
|---------------|----------|----------------|----------|---------|
| Flot1         | Tmem159  | Sertad1        | Phlda1   | Dok2    |
| Ifitm1        | Bbc3     | Tns1           | Lmna     | Tinag1l |
| Casp6         | Lyz2     | Gbp2           | Plxdc2   | Sparc   |
| 0610040J01Rik | Trem14   | Slc5a3         | Tnfrsf25 | Rgs4    |
| Tmem173       | Trf      | Aldh1a2        | Kitl     |         |
| Jak3          | Ncr1     | Cd300lg        | Col4a1   |         |
| Zdhhc23       | Efnb2    | Adgre1         | Ace      |         |
| Itga6         | Hmox1    | Atp8b1         | Zfand2a  |         |
| Smad7         | Ccl9     | Cers4          | Sdc1     |         |
| Gpr4          | Wnt11    | Plau           | Ltb4r1   |         |
| Ctnnd2        | Pde2a    | Gfra2          | Mmp19    |         |
| Gpr171        | Hsp90aa1 | Slc11a1        | Mamdc2   |         |
| Ggt5          | Otof     | Steap4         | Aplnr    |         |
| Syt11         | Atf4     | Gimap4         | Lpl      |         |
| Ubr4          | Rasl11b  | Gypc           | Serpib10 |         |

Table S6. Related to Figure 5

**40 differentially expressed genes: St St vs MI cDC1s and moDCs**

| Down-regulated |         |         |         |          |
|----------------|---------|---------|---------|----------|
| Bcl6b          | Tnni3   | Cd34    | Gm13889 | Epas1    |
| S100a16        | Mb      | Cald1   | Lims2   | Ly6c1    |
| Fam101b        | Rasl12  | Aqp7    | Cav1    | She      |
| Fam65b         | Adgrg1  | Mgl1    | Ltbp4   | Mustn1   |
| Ebi3           | Itga7   | Alpl    | Rhoj    | Serpinh1 |
| Hs3st1         | Afap111 | Apold1  | Tmem47  | Tpm2     |
| Egfl7          | Myl9    | Tmem204 | Nrip2   | Gja5     |
| Slc2a4         | Ly6a    | Nppa    | Ablim1  | Tagln    |



Table S7. Related to Figure 5

**105 differentially expressed genes: St St vs MI cDC2s and moDCs**

| Up-regulated  |               | Down-regulated |          |         |
|---------------|---------------|----------------|----------|---------|
| Fxyd7         | St3gal1       | Adamts1        | Hepacam2 | P3h2    |
| Cdh1          | Adrb2         | Acta2          | Dmpk     | Rnf144a |
| Zbtb18        | Ctsf          | Tmcc1          | Slc12a2  | Cyp2ab1 |
| Lgi4          | Id1           | Mxra7          | Slc15a2  | F13a1   |
| 2900026A02Rik | Bank1         | Oasl1          | Lrrc3    | Cd226   |
| Galnt6        | Gbp9          | Gm6297         | Ly6c2    | Fcrls   |
| Angptl2       | Cxx1c         | BC035044       | Cdc42ep2 | Cd36    |
| Spon1         | Tsc22d3       | Cracr2b        | Klra2    | Lyz1    |
| Il18rap       | Maf           | Cd209d         | Ear2     | Kenq1   |
| Arhgap24      | St3gal6       | Celf4          | Cd209b   | Cd2     |
| Gcnt1         | Icam2         | Tmem26         | Trpm2    | Hspb1   |
| Il7r          | Klhl13        | Hcar2          | Crym     | Hpgd    |
| Aatk          | Clec4f        | Fabp4          | Agpat3   | Retnla  |
| Scin          | Folr2         | Cish           | Lck      |         |
| Tmem158       | Gcc1          | Gm14085        | Sgce     |         |
| Plxnc1        | Itga9         | Ndnf           | Adgre4   |         |
| Slc7a11       | Nos3          | Slco2b1        | Tlr12    |         |
| Nxpe5         | Adrb1         | Cp             | Lilra5   |         |
| Stat4         | Adgre5        | Tppp           | Timp3    |         |
| Ifit2         | Sh3bp5        | Adamdec1       | Ptgs1    |         |
| Map4k3        | Alox15        | Pf4            | Mmp13    |         |
| Dock5         | 1810011O10Rik | Ehd2           | Il6      |         |
| Anpep         | Gbp4          | Spic           | Itgal    |         |

Table S8. Related to Figure 6

**Differentially expressed genes (high stringency): St St vs MI cDC2s**

| Up-regulated |         | Down-regulated |               |
|--------------|---------|----------------|---------------|
| Plekha5      | Prss30  | Tnfaip6        | Plcb1         |
| Fads2        | Ffar4   | Hnmt           | Spink2        |
| Tbc1d16      | Hpgds   | Fgd4           | Galnt9        |
| Cst7         | Spint2  | Tnfaip811      | 9830107B12Rik |
| Klrb1f       | Hivep2  | Gfi1b          | Tlr7          |
| Siglece      | Pvr14   | Fgd6           | Nupr1         |
| Myo1b        | St8sia6 | Steap3         | 4930455G09Rik |
| Adam11       |         | Cebpe          | Tmem229a      |

## **Supplemental Experimental Procedures**

### **Flow cytometric analysis and sorting**

Following Abs were used: CD3 (145-2C11), CD19 (1D3), CD45.2 (104), MHC class II (M5/114), CD11c (N418), CD64 (X54-5/7.1), XCR-1 (ZET), CD172 $\alpha$  (P84), CD26 (H194-112), Flt3 (A2F10), CD11b (M1/70), CD103 (2E7), CD24 (M1/69), CADM1 (CM004-3), MerTK (polyclonal), Fc $\epsilon$ R1 (MAR-1), CCR2 (475301), F4/80 (BM8), IRF4 (M-17), IRF8 (C-19), CD4 (RM4-5), V alpha 2 chain (B20.1), V beta 8.1 8.2 chain (MR5-2), CD90.1 (OX-7), T-bet (4B10), RoR $\gamma$ t (Q31-378), Foxp3 (FJK-16s), CD25 (PC61), CD44 (IM7), CD86 (PO3), CD40 (3/23) and CD80 (16-10A1).

### **RNA sequencing**

Trimmomatic was utilized for the preprocessing of the RNA-seq data. The adapters were cut off. Reads were clipped when the quality fell below 20 and were rejected when longer than 35. FastQC was performed and all samples passed quality control. Reads were plotted to the mouse reference genome via Tophat2 and calculated via HTSeqCount. R/Bioconductor was utilized to analyze the samples and data normalization was performed using the DESeq2 procedure. To identify unique cDC2 genes we filtered the normalized log<sub>2</sub> expression table using the R package 'sqldf'. Log<sub>2</sub> expression of cDC2s from MI heart needed to be at least 1,2 log<sub>2</sub> value bigger than cDC2s from steady state heart. The differences between the other steady state and MI samples (cDC1s, moDCs and MFs) needed to be lower than 0,3 log<sub>2</sub> value. Gene Set Enrichment Analysis (GSEA) were performed using GSEA GUI v2.2.3 of the Broad Institute (<http://software.broadinstitute.org/gsea/downloads.jsp>). We used GSEA Pre-Ranked analysis with default parameters and used all genes ordered by LogFC (MI vs StSt, upregulated gene is upregulated in MI) as ranked list.
